# Supplementary material for: Effect of age and the individual on the gastrointestinal bacteriome of ponies fed a high-starch diet
Source: PubMed Central journal article supplement (PMC7209120; doi:10.1371/journal.pone.0232689), 2020-05-08

**Figure S1: Rarefaction curves**

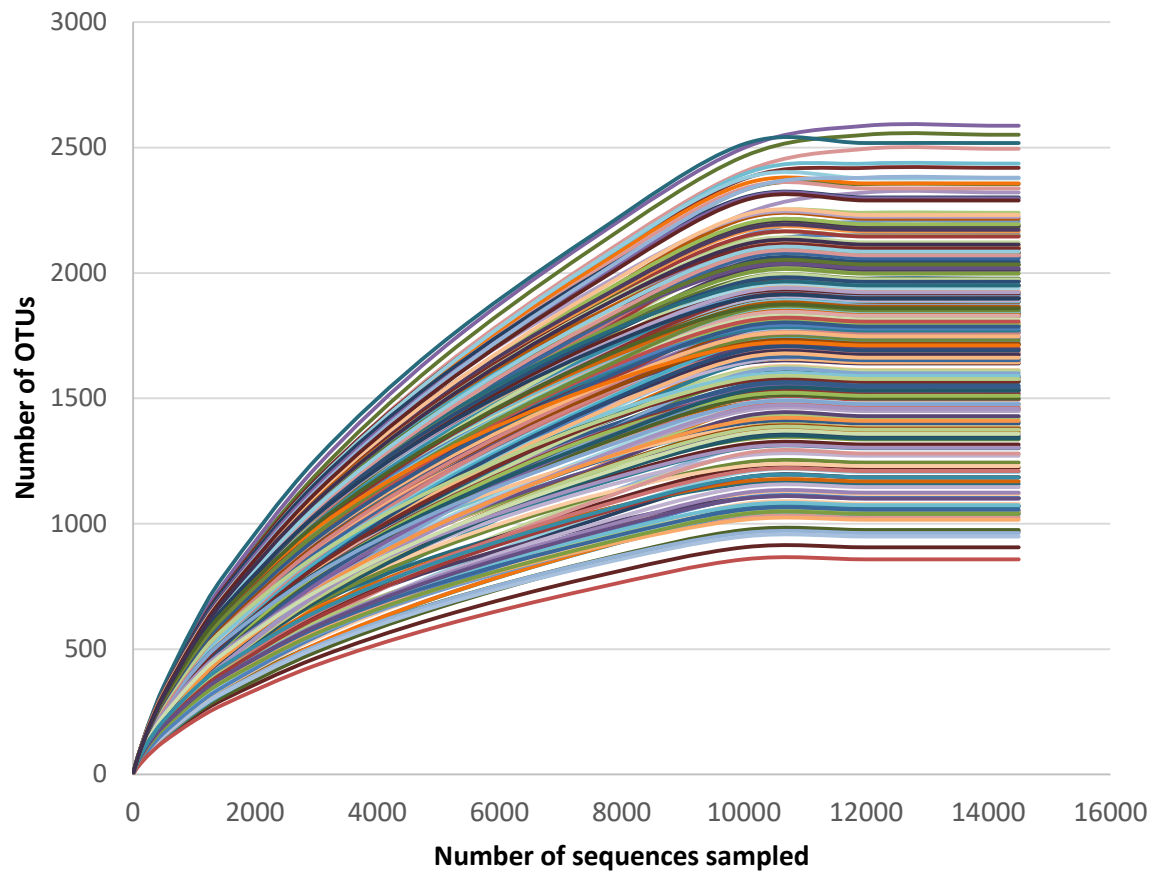

Supplement: pone.0232689.s010.pdf [file pone.0232689.s010.pdf]
