# Supplementary material for: Effect of age and the individual on the gastrointestinal bacteriome of ponies fed a high-starch diet
Source: PubMed Central journal article supplement (PMC7209120; doi:10.1371/journal.pone.0232689), 2020-05-08

**Figure S2: Non-metric multi-dimensional scaling plot of the bacterial OTU data (excluding those OTU's present at <0.01% relative abundance) by group and diet**

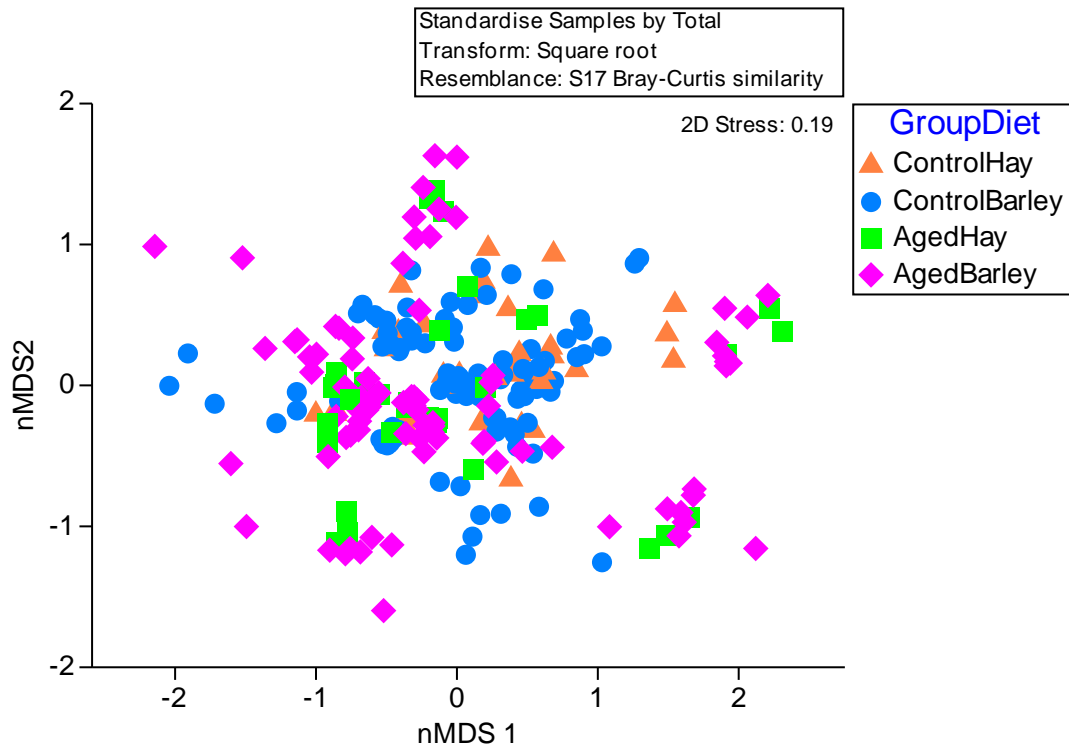

Supplement: pone.0232689.s011.pdf [file pone.0232689.s011.pdf]
